# Supplementary material
Source: MDPI journal article supplement (https://www.mdpi.com/2073-4336/8/1/12)
Supplement: s1 [file s1]

with(CodeGeneration):

# Parameters
Q := 6:

###########################################################

sublist := proc(list, ini)
  [seq(list[i],i=ini..nops(list))]:
end proc:

addElt := proc(elt, list)
local templist, i:
  templist:=[]:
  for i from 1 to nops(list) do
    templist:=[op(templist),[elt, op(list[i])]]:
  end do:
  templist:
end proc:

listSubsets := proc(L, i)
local n, j, fl, temp:
  n := nops(L):
  if i=1 then
    fl:=[]:
    for j from 1 to n do
      fl:=[op(fl),[L[j]]]:
    end do:
  else
    fl:=[]:
    for j from 1 to n-i+1 do
      temp:=listSubsets(sublist(L,j+1),i-1):
      temp:=addElt(L[j],temp):
      fl:=[op(fl),op(temp)]:
    end do:
  end if:
  fl:
end proc:

listAllSubsets := proc(Q::posint)
description "generates $S(\\cal D)$ with Q names":
local L,i, temp, fl:
  L := [A||(1..Q)]:
  fl := []:
  for i from 1 to Q do
    fl:=[op(fl),op(listSubsets(L,i))]:
  end do:
  fl:
end proc:

SigmaAk := proc(L::list,item)
description "applies the operator $\\Sigma_{item}$ of "
            "eq. (3.12) to L":
local dd,outL:
  outL := NULL:
  for dd in L do
    if(member(item,dd)) then
      outL := outL,dd:
    end if:
  end do:
  outL:
end proc:

TauAk := proc(L::list,item)
local dd,outL:
  outL := NULL:
  for dd in L do
    if(not member(item,dd)) then
      outL := outL,dd:
    end if:
  end do:
  outL:
end proc:

removeListItem := proc(L::list,item)
  remove(has,L,item):
end proc:

thetak := proc(L::list,k::posint)
description "applies the operator $\\theta_{k}$ of "
            "eq. (3.10) to L":
local seq1,seq2,i:
  if (k>nops(L)) then
    return L:
  end if:
  seq1 := seq(op(i,L),i=1..k-1):
  seq2 := seq(op(i,L),i=k+1..nops(L)):
  return [seq1,seq2]:
end proc:

rhok := proc(L::list,k::posint)
description "applies the operator $\\rho_{k}$ of "
            "eq. (3.11) to L":
local seq1,seq2,i:
  if (k>nops(L)) then
    return NULL:
  end if:
  return op(k,L):
end proc:

# ===========================================================
# Case I
# ===========================================================

CaseIraise := proc(Dset::list,i::posint)

global Q,NBList,pin,pout:
local out,j,k,Wk,Uk,NBSubList,Dtilde:
  if(nops(Dset)=1) then
    print("[CaseIraise]: WARNING -> |Dset|=1"):
    return:
  end if:
  if(i>Q) then
    print("[CaseIraise]: WARNING -> index i out of range"):
    return:
  end if:
  out := 0:
  for k from 1 to nops(Dset) do
    Wk := rhok(Dset,k):
    Uk := thetak(Dset,k):
    NBSubList := SigmaAk(NBList,Wk):
    for Dtilde in NBSubList do
      out := out +
      (1/nops(Dtilde))*n[i,Uk]*(pin*n[i,Dtilde] +
                            pout*sum(n[j,Dtilde],j=1..i-1) +
                            pout*sum(n[j,Dtilde],j=i+1..Q)):
    end do:
  end do:
  return out:
end proc:

CaseIlower1 := proc(Dset::list,i::posint)
global Q,NBList,pin,pout:
local out,j,k,Wk,NBSubList,Dtilde:
  if(nops(Dset)=1) then
    print("[CaseIlower1]: WARNING -> |Dset|=1"):
    return:
  end if:
  if(i>Q) then
    print("[CaseIlower1]: WARNING -> index i out of range"):
    return:
  end if:
  out := 0:
  for k from 1 to nops(Dset) do
    Wk := rhok(Dset,k):
    NBSubList := SigmaAk(NBList,Wk):
    for Dtilde in NBSubList do
      out := out +
      (1/nops(Dtilde))*n[i,Dset]*(pin*n[i,Dtilde] +
                           pout*sum(n[j,Dtilde],j=1..i-1) +
                           pout*sum(n[j,Dtilde],j=i+1..Q)):
    end do:
  end do:
  return out:
end proc:

CaseIlower2 := proc(Dset::list,i::posint)
global Q,NBList,pin,pout:
local out,j,k,Wk,NBSubList,Dtilde:
  if(nops(Dset)=1) then
    print("[CaseIlower2]: WARNING -> |Dset|=1"):
    return:
  end if:
  if(i>Q) then
    print("[CaseIlower2]: WARNING -> index i out of range"):
    return:
  end if:
  out := 0:
  for k from 1 to nops(Dset) do
    Wk := rhok(Dset,k):
    NBSubList := SigmaAk(NBList,Wk):
    for Dtilde in NBSubList do
      out := out +
      (1/nops(Dset))*n[i,Dset]*(pin*n[i,Dtilde] +
                            pout*sum(n[j,Dtilde],j=1..i-1) +
                            pout*sum(n[j,Dtilde],j=i+1..Q)):
    end do:
  end do:
  return out:
end proc:

# ===========================================================
# Case II
# ===========================================================

CaseIIraise1 := proc(Dset::list,i::posint)
global Q,NBList,pin,pout:
local out,j,k,Ak,NBSubList,DL:
  if(nops(Dset)>1) then
    print("[CaseIIraise1]: WARNING -> |Dset|>1"):
    return:
  end if:

  if(i>Q) then
    print("[CaseIIraise1]: WARNING -> index i out of range"):
    return:
  end if:
  out := 0:
  Ak := op(1,Dset):
  NBSubList := SigmaAk(NBList,Ak):
  for DL in NBSubList do
    if (nops(DL)>1) then
      out := out +
      n[i,DL]*(pin*n[i,Dset] +
               pout*sum(n[j,Dset],j=1..i-1) +
               pout*sum(n[j,Dset],j=i+1..Q)):
    end if:
  end do:
  return out:
end proc:

CaseIIraise2 := proc(Dset::list,i::posint)
global Q,NBList,pin,pout:
local out,j,k,Ak,NBSubList,DS:
  if(nops(Dset)>1) then
    print("[CaseIIraise2]: WARNING -> |Dset|>1"):
    return:
  end if:
  if(i>Q) then
    print("[CaseIIraise2]: WARNING -> index i out of range"):
    return:
  end if:
  out := 0:
  Ak := op(1,Dset):
  NBSubList := SigmaAk(NBList,Ak):
  for DS in NBSubList do
    if (nops(DS)>1) then
      out := out +
      (1/nops(DS))*n[i,DS]*(pin*n[i,Dset] +
                            pout*sum(n[j,Dset],j=1..i-1) +
                            pout*sum(n[j,Dset],j=i+1..Q)):
    end if:
  end do:
  return out:
end proc:

CaseIIraise3 := proc(Dset::list,i::posint)
global Q,NBList,pin,pout:
local out,j,k,Ak,NBSubList,DS,DL:
  if(nops(Dset)>1) then
    print("[CaseIIraise3]: WARNING -> |Dset|>1"):
    return:
  end if:
  if(i>Q) then
    print("[CaseIIraise3]: WARNING -> index i out of range"):
    return:
  end if:
  out := 0:
  Ak := op(1,Dset):
  NBSubList := SigmaAk(NBList,Ak):
  for DS in NBSubList do
    for DL in NBSubList do
      if (nops(DS)>1 and nops(DL)>1) then
        out := out +
       (1/nops(DS))*(2*pin*n[i,DS]*n[i,DL] +
       pout*sum(n[i,DS]*n[j,DL] + n[j,DS]*n[i,DL],j=1..i-1) +
       pout*sum(n[i,DS]*n[j,DL] + n[j,DS]*n[i,DL],j=i+1..Q)):
      end if:
    end do:
  end do:
  return out:
end proc:

CaseIIlower1 := proc(Dset::list,i::posint)
global Q,NBList,pin,pout:
local out,j,k,Ak,NBSubList,DS:
  if(nops(Dset)>1) then
    print("[CaseIIlower1]: WARNING -> |Dset|>1"):
    return:
  end if:
  if(i>Q) then
    print("[CaseIIlower1]: WARNING -> index i out of range"):
    return:
  end if:
  out := 0:
  Ak := op(1,Dset):
  NBSubList := SigmaAk(NBList,Ak):
  for DS in NBSubList do
    if (nops(DS)>1) then
      out := out +
      ((nops(DS)-1)/nops(DS))*n[i,Dset]*(pin*n[i,DS] +
                               pout*sum(n[j,DS],j=1..i-1) +
                               pout*sum(n[j,DS],j=i+1..Q)):
    end if:
  end do:
  return out:
end proc:

CaseIIlower2 := proc(Dset::list,i::posint)
global Q,NBList,pin,pout:
local out,j,k,Ak,NBSubList,DS:
  if(nops(Dset)>1) then
    print("[CaseIIlower2]: WARNING -> |Dset|>1"):
    return:
  end if:
  if(i>Q) then
    print("[CaseIIlower2]: WARNING -> index i out of range"):
    return:
  end if:
  out := 0:
  Ak := op(1,Dset):
  NBSubList := [TauAk(NBList,Ak)]:
  for DS in NBSubList do
    out := out +
    n[i,Dset]*(pin*n[i,DS] +
               pout*sum(n[j,DS],j=1..i-1) +
               pout*sum(n[j,DS],j=i+1..Q)):
  end do:
  return out:
end proc:

#-------------------------------------------------------

NBList := listAllSubsets(Q):

f_intra := Array([seq(0,i=1..Q*(2^Q-1))]):
f_inter := Array([seq(0,i=1..Q*(2^Q-1))]):

SDctr := 1:
for qq from 1 to Q do
  Dctr := 1:
  for Dset in op(1..-2,NBList) do

    if(nops(Dset)>1) then
      f1       := expand(CaseIraise(Dset,qq)):
      f1_intra := coeff(f1,pin):

      f1_inter := coeff(f1,pout):
      f2       := expand(CaseIlower1(Dset,qq)):
      f2_intra := coeff(f2,pin):
      f2_inter := coeff(f2,pout):
      f3       := expand(CaseIlower2(Dset,qq)):
      f3_intra := coeff(f3,pin):
      f3_inter := coeff(f3,pout):

      T_intra  := f1_intra - f2_intra - f3_intra:
      T_inter  := f1_inter - f2_inter - f3_inter:
    else
      g1       := expand(CaseIIraise1(Dset,qq)):
      g1_intra := coeff(g1,pin):
      g1_inter := coeff(g1,pout):

      g2       := expand(CaseIIraise2(Dset,qq)):
      g2_intra := coeff(g2,pin):
      g2_inter := coeff(g2,pout):

      g3       := expand(CaseIIraise3(Dset,qq)):
      g3_intra := coeff(g3,pin):
      g3_inter := coeff(g3,pout):

      g4       := expand(CaseIIlower1(Dset,qq)):
      g4_intra := coeff(g4,pin):
      g4_inter := coeff(g4,pout):

      g5       := expand(CaseIIlower2(Dset,qq)):
      g5_intra := coeff(g5,pin):
      g5_inter := coeff(g5,pout):

      T_intra := g1_intra + g2_intra + g3_intra
               - g4_intra - g5_intra:
      T_inter := g1_inter + g2_inter + g3_inter
               - g4_inter - g5_inter:
    end if:

    # =======================================================
    #  remove Rosetta notebooks
    # =======================================================

    for ii from 1 to Q do
      for jj from 1 to (2**Q-2) do
        T_intra := eval(T_intra,
            n[ii,op(jj,NBList)]=xx[jj+(ii-1)*(2**Q-1)]):
        T_inter := eval(T_inter,
            n[ii,op(jj,NBList)]=xx[jj+(ii-1)*(2**Q-1)]):
      end do:
      T_intra := expand(eval(T_intra,n[ii,op(-1,NBList)]=
             1-add(xx[kk+(ii-1)*(2**Q-1)],kk=1..(2**Q-2)))):
      T_inter := expand(eval(T_inter,n[ii,op(-1,NBList)]=
             1-add(xx[kk+(ii-1)*(2**Q-1)],kk=1..(2**Q-2)))):
    end do:

    printf("#  clique = %2d \t state = %s \t index = %d\n\n",
          qq,convert(Dset,string),SDctr):
    printf("#  nops(intra) = %10d \t nops(inter) = %10d\n\n",
          nops(T_intra), nops(T_inter)):

    f_intra[SDctr] := T_intra:
    f_inter[SDctr] := T_inter:

    SDctr := SDctr + 1:
    Dctr := Dctr+1:

  end do:
  f_intra[SDctr] := 0:
  f_inter[SDctr] := 0:
  SDctr := SDctr + 1:

end do:

save f_intra,`f_intra.m`:
save f_inter,`f_inter.m`:
